# Supplementary material for: Baseline and change in serum lipid and uric acid level over time and incident of nonalcoholic fatty liver disease (NAFLD) in Chinese adults
Source: PubMed Central journal article supplement — Sci Rep. 2024 Aug 9;14:18547. doi: 10.1038/s41598-024-69411-6 (PMC11316048; doi:10.1038/s41598-024-69411-6), 2024-08-09
Supplement: 41598_2024_69411_MOESM1_ESM.pdf [file 41598_2024_69411_MOESM1_ESM.pdf]

**Baseline and change in serum lipid and uric acid level over time and incident of nonalcoholic fatty liver disease (NAFLD) in Chinese adults**

Ya Huang<sup>1</sup>, Tao Jin<sup>1</sup>, Wenji Ni<sup>1</sup>, Ying Zhou<sup>1</sup>, Rui Zhang<sup>1</sup>, Dandan Li<sup>1</sup>, Yanhui Wan<sup>1</sup>, Yonghui Shi<sup>2</sup>, Xiaoping Hu<sup>3</sup>, Yong Zhong<sup>1</sup>

Table S1. Quality control data for the laboratory testing of metabolism-related indicators.

| Laboratory indicators | Bias (%)            | Intra-assay CV | Inter-assay CV |
|-----------------------|---------------------|----------------|----------------|
| TC                    | (-3.76%) - (-1.10%) | 2.3%           | 2.8%           |
| TG                    | (-5.48%) - 2.76     | 4.4%           | 3.3%           |
| HDL-C                 | (-9.71%) - (-1.54%) | 4.1%           | 3.1%           |
| LDL-C                 | (-3.45%) - (-0.53%) | 4.2%           | 2.1%           |
| FBG                   | (-2.38%) - 1.86%    | 2.8%           | 3.0%           |
| UA                    | (-5.06%) - 1.58%    | 4.1%           | 3.2%           |
| ft3                   | 1.80% - 3.81%       | 3.9%           | 2.0%           |
| ft4                   | (-0.48%) - 3.66%    | 2.9%           | 1.8%           |
| TSH                   | (-2.51%) - 4.31%    | 5.6%           | 4.8%           |
| T3                    | (-3.07%) - 2.21%    | 4.4%           | 2.5%           |
| T4                    | (-1.39%) - 2.76%    | 2.5%           | 2.1%           |

FBG: fasting blood glucose; TG: triglyceride; TC: total cholesterol; HDL-C: high density lipoprotein cholesterol; LDL-C: low density lipoprotein cholesterol; ft3: free triiodothyronine; ft4: free thyroxine; TSH: thyroid stimulating hormone; T3: triiodothyronine; T4: thyroxine; UA: uric acid.

Table S2. Associations between baseline metabolic markers and 1-year risk of incident NAFLD stratified by age.

| Age < 40 years old<br>(n=2622)             |                         |                    | Age ≥ 40 years old<br>(n=803)              |                          |                    |
|--------------------------------------------|-------------------------|--------------------|--------------------------------------------|--------------------------|--------------------|
| Characteristic                             | OR (95%CI)              | P value            | Characteristic                             | OR (95%CI)               | P value            |
| Age, per year                              | 1.03 (0.97-1.09)        | 0.36               | Age, per year                              | 1.08 (1.02-1.14)         | 0.009              |
| Sex, female vs male                        | 0.55 (0.31-0.96)        | 0.04               | Sex, female vs male                        | 0.45 (0.27-0.73)         | 0.001              |
| <b>BMI, per SD (2.69 kg/m<sup>2</sup>)</b> | <b>2.77 (2.17-3.55)</b> | <b>&lt; 0.0001</b> | <b>BMI, per SD (2.54 kg/m<sup>2</sup>)</b> | <b>2.55 (1.90-3.41)</b>  | <b>&lt; 0.0001</b> |
| SBP, per SD (12 mmHg)                      | 1.13 (0.84-1.52)        | 0.42               | SBP, per SD (13 mmHg)                      | 0.73 (0.50-1.04)         | 0.08               |
| <b>DBP, per SD (9 mmHg)</b>                | <b>1.36 (1.02-1.81)</b> | <b>0.04</b>        | <b>DBP, per SD (10 mmHg)</b>               | <b>1.46 (1.02-2.10)</b>  | <b>0.04</b>        |
| FBG, per SD (0.70 mmol/L)                  | 1.10 (0.96-1.26)        | 0.17               | <b>FBG, per SD (1.06 mmol/L)</b>           | <b>1.18 (1.004-1.38)</b> | <b>0.04</b>        |
| <b>TG, per SD (0.81 mmol/L)</b>            | <b>1.20 (1.03-1.40)</b> | <b>0.02</b>        | <b>TG, per SD (1.09 mmol/L)</b>            | <b>1.21 (1.01-1.45)</b>  | <b>0.04</b>        |
| TC, per SD (0.85 mmol/L)                   | 0.90 (0.72-1.13)        | 0.36               | TC, per SD (0.78 mmol/L)                   | 0.86 (0.67-1.11)         | 0.24               |
| <b>HDL-C, per SD (0.33 mmol/L)</b>         | <b>0.58 (0.46-0.73)</b> | <b>&lt; 0.0001</b> | <b>HDL-C, per SD (0.33 mmol/L)</b>         | <b>0.71 (0.55-0.91)</b>  | <b>0.006</b>       |
| <b>LDL-C, per SD (0.66 mmol/L)</b>         | <b>1.27 (1.07-1.50)</b> | <b>0.007</b>       | LDL-C, per SD (0.64 mmol/L)                | 1.12 (0.91-1.37)         | 0.31               |
| <b>UA, per SD (95.25 umol/L)</b>           | <b>1.60 (1.24-2.08)</b> | <b>0.0004</b>      | <b>UA, per SD (95.25 umol/L)</b>           | <b>1.54 (1.26-1.88)</b>  | <b>&lt; 0.0001</b> |
| <b>ft3, per SD (0.81 pmol/L)</b>           | <b>1.81 (1.36-2.40)</b> | <b>&lt; 0.0001</b> | ft3, per SD (1.01 pmol/L)                  | 0.96 (0.71-1.31)         | 0.81               |
| <b>ft4, per SD (2.17 pmol/L)</b>           | <b>0.57 (0.42-0.77)</b> | <b>0.0003</b>      | ft4, per SD (2.14 pmol/L)                  | 0.98 (0.72-1.33)         | 0.88               |
| <b>ALT, per SD (11 U/L)</b>                | <b>1.99 (1.42-2.80)</b> | <b>&lt; 0.0001</b> | ALT, per SD (20 U/L)                       | 0.94 (0.59-1.49)         | 0.78               |
| AST, per SD (5 U/L)                        | 0.83 (0.64-1.07)        | 0.13               | AST, per SD (8 U/L)                        | 1.26 (0.81-1.96)         | 0.32               |

BMI: body mass index; SBP: systolic blood pressure; DBP: diastolic blood pressure; FBG: fasting blood glucose; TG: triglyceride; TC: total cholesterol; HDL-C: high density lipoprotein cholesterol; LDL-C: low density lipoprotein cholesterol; ft3: free triiodothyronine; ft4: free thyroxine; TSH: thyroid stimulating hormone; UA: uric acid. SD: standard deviation.

Data was adjusted for age, sex, smoking and alcohol habits, status of diabetes and hypertension, BMI, SBP, DBP, FBG, TG, TC, HDL-C, LDL-C, UA, ft3, ft4, ALT and AST.

Table S3. Associations between baseline metabolic markers and 1-year risk of incident NAFLD stratified by sex.

| Male (n=1146)                              |                         |                    | Female (n=2279)                            |                         |                    |
|--------------------------------------------|-------------------------|--------------------|--------------------------------------------|-------------------------|--------------------|
| Characteristic                             | OR (95%CI)              | <i>P</i> value     | Characteristic                             | OR (95%CI)              | <i>P</i> value     |
| Age, per year                              | 1.02 (0.98-1.05)        | 0.33               | Age, per year                              | 1.08 (1.04-1.13)        | 0.0002             |
| <b>BMI, per SD (2.34 kg/m<sup>2</sup>)</b> | <b>1.19 (1.77-2.71)</b> | <b>&lt; 0.0001</b> | <b>BMI, per SD (2.47 kg/m<sup>2</sup>)</b> | <b>2.79 (2.06-3.79)</b> | <b>&lt; 0.0001</b> |
| SBP, per SD (12 mmHg)                      | 0.79 (0.61-1.04)        | 0.09               | SBP, per SD (12 mmHg)                      | 1.16 (0.77-1.74)        | 0.49               |
| <b>DBP, per SD (9 mmHg)</b>                | <b>1.56 (1.18-2.07)</b> | <b>0.002</b>       | DBP, per SD (9 mmHg)                       | 1.25 (0.85-1.84)        | 0.25               |
| FBG, per SD (0.68 mmol/L)                  | 0.81 (0.63-1.05)        | 0.12               | <b>FBG, per SD (0.95 mmol/L)</b>           | <b>1.21 (1.06-1.38)</b> | <b>0.004</b>       |
| <b>TG, per SD (0.71 mmol/L)</b>            | <b>1.32 (1.12-1.55)</b> | <b>0.0007</b>      | <b>TG, per SD (0.71 mmol/L)</b>            | <b>1.38 (1.21-1.58)</b> | <b>&lt; 0.0001</b> |
| TC, per SD (0.81 mmol/L)                   | 0.82 (0.67-1.00)        | 0.05               | TC, per SD (0.84 mmol/L)                   | 0.98 (0.73-1.33)        | 0.93               |
| <b>HDL-C, per SD (0.27 mmol/L)</b>         | <b>0.75 (0.62-0.91)</b> | <b>0.003</b>       | <b>HDL-C, per SD (0.34 mmol/L)</b>         | <b>0.68 (0.51-0.89)</b> | <b>0.006</b>       |
| LDL-C, per SD (0.67 mmol/L)                | 1.13 (0.95-1.33)        | 0.17               | <b>LDL-C, per SD (0.63 mmol/L)</b>         | <b>1.37 (1.09-1.71)</b> | <b>0.006</b>       |
| <b>UA, per SD (82.5 umol/L)</b>            | <b>1.39 (1.18-1.63)</b> | <b>&lt; 0.0001</b> | <b>UA, per SD (55.11 umol/L)</b>           | <b>1.60 (1.31-1.94)</b> | <b>&lt; 0.0001</b> |
| ft3, per SD (0.88 pmol/L)                  | 1.01 (0.81-1.27)        | 0.91               | <b>ft3, per SD (0.82 pmol/L)</b>           | <b>1.40 (1.00-1.98)</b> | <b>0.04</b>        |
| <b>ft4, per SD (1.67 pmol/L)</b>           | <b>0.75 (0.61-0.94)</b> | <b>0.01</b>        | ft4, per SD (2.43 pmol/L)                  | 0.77 (0.53-1.14)        | 0.20               |
| ALT, per SD (19 U/L)                       | 1.45 (0.95-2.22)        | 0.08               | ALT, per SD (8 U/L)                        | 1.40 (0.89-2.18)        | 0.15               |
| AST, per SD (7 U/L)                        | 0.87 (0.59-1.29)        | 0.49               | AST, per SD (5 U/L)                        | 0.84 (0.52-1.36)        | 0.48               |

BMI: body mass index; SBP: systolic blood pressure; DBP: diastolic blood pressure; FBG: fasting blood glucose; TG: triglyceride; TC: total cholesterol; HDL-C: high density lipoprotein cholesterol; LDL-C: low density lipoprotein cholesterol; ft3: free triiodothyronine; ft4: free thyroxine; TSH: thyroid stimulating hormone; UA: uric acid. SD: standard deviation.

Data was adjusted for age, smoking and alcohol habits, status of diabetes and hypertension, BMI, SBP, DBP, FBG, TG, TC, HDL-C, LDL-C, UA, ft3, ft4, ALT and AST.

Table S4. Associations between one-year changes of metabolism-related indicators and risk of incident NAFLD stratified by age.

| Age < 40 years old<br>(n=2622)              |                         |                    | Age ≥ 40 years old<br>(n=803)          |                         |                    |
|---------------------------------------------|-------------------------|--------------------|----------------------------------------|-------------------------|--------------------|
| Metabolism-related indicators               | OR (95%CI)              | P value            | Metabolism-related indicators          | OR (95%CI)              | P value            |
| <b>ΔBMI, per SD (0.94 kg/m<sup>2</sup>)</b> | <b>2.78 (1.79-4.31)</b> | <b>&lt; 0.0001</b> | ΔBMI, per SD (1.83 kg/m <sup>2</sup> ) | 1.16 (0.91-1.48)        | 0.23               |
| ΔSBP, per SD (11 mmHg)                      | 1.03 (0.77-1.37)        | 0.86               | ΔSBP, per SD (11 mmHg)                 | 1.08 (0.80-1.45)        | 0.63               |
| ΔDBP, per SD (9 mmHg)                       | 0.87 (0.66-1.15)        | 0.33               | ΔDBP, per SD (9 mmHg)                  | 1.03 (0.79-1.35)        | 0.81               |
| ΔFBG, per SD (1.78 mmol/L)                  | 1.06 (0.84-1.33)        | 0.61               | <b>ΔFBG, per SD (1.30 mmol/L)</b>      | <b>1.40 (1.08-1.82)</b> | <b>0.01</b>        |
| <b>ΔTG, per SD (0.91 mmol/L)</b>            | <b>1.33 (1.10-1.60)</b> | <b>0.003</b>       | <b>ΔTG, per SD (1.45 mmol/L)</b>       | <b>2.23 (1.51-3.29)</b> | <b>&lt; 0.0001</b> |
| ΔTC, per SD (0.72 mmol/L)                   | 0.85 (0.67-1.10)        | 0.22               | ΔTC, per SD (0.81 mmol/L)              | 1.24 (0.96-1.60)        | 0.10               |
| <b>ΔHDL-C, per SD (0.26 mmol/L)</b>         | <b>0.49 (0.35-0.67)</b> | <b>&lt; 0.0001</b> | <b>ΔHDL-C, per SD (0.30 mmol/L)</b>    | <b>0.49 (0.36-0.68)</b> | <b>&lt; 0.0001</b> |
| ΔLDL-C, per SD (0.52 mmol/L)                | 0.90 (0.70-1.15)        | 0.39               | ΔLDL-C, per SD (0.66 mmol/L)           | 1.09 (0.83-1.42)        | 0.53               |
| <b>ΔUA, per SD (53.50 μmol/L)</b>           | <b>1.24 (1.00-1.54)</b> | <b>0.04</b>        | <b>ΔUA, per SD (55.33 μmol/L)</b>      | <b>1.54 (1.18-2.01)</b> | <b>0.002</b>       |
| <b>ΔfT3, per SD (0.74 pmol/L)</b>           | <b>1.71 (1.12-2.61)</b> | <b>0.01</b>        | ΔfT3, per SD (1.19 pmol/L)             | 0.84 (0.53-1.33)        | 0.46               |
| ΔfT4, per SD (1.89 pmol/L)                  | 1.24 (0.89-1.73)        | 0.21               | ΔfT4, per SD (2.40 pmol/L)             | 1.29 (0.89-1.88)        | 0.88               |

BMI: body mass index; SBP: systolic blood pressure; DBP: diastolic blood pressure; FBG: fasting blood glucose; TG: triglyceride; TC: total cholesterol; HDL-C: high density lipoprotein cholesterol; LDL-C: low density lipoprotein cholesterol; fT3: free triiodothyronine; fT4: free thyroxine; TSH: thyroid stimulating hormone; UA: uric acid. SD: standard deviation.

Data was adjusted for age, sex, smoking and alcohol habits, status of diabetes and hypertension, BMI, SBP, DBP, FBG, TG, TC, HDL-C, LDL-C, UA, fT3, fT4, ALT and AST.

Table S5. Associations between one-year changes of metabolism-related indicators and risk of incident NAFLD stratified by sex.

| Male (n=1146)                          |                         |                    | Female (n=2279)                        |                         |                |
|----------------------------------------|-------------------------|--------------------|----------------------------------------|-------------------------|----------------|
| Metabolism-related indicators          | OR (95%CI)              | <i>P</i> value     | Metabolism-related indicators          | OR (95%CI)              | <i>P</i> value |
| ΔBMI, per SD (1.51 kg/m <sup>2</sup> ) | 1.32 (0.95-1.85)        | 0.10               | ΔBMI, per SD (0.95 kg/m <sup>2</sup> ) | 1.36 (0.49-3.80)        | 0.55           |
| ΔSBP, per SD (11 mmHg)                 | 0.98 (0.78-1.24)        | 0.88               | ΔSBP, per SD (11 mmHg)                 | 1.33 (0.88-2.02)        | 0.18           |
| ΔDBP, per SD (9 mmHg)                  | 0.93 (0.74-1.15)        | 0.48               | ΔDBP, per SD (9 mmHg)                  | 1.07 (0.72-1.58)        | 0.75           |
| <b>ΔFBG, per SD (0.78 mmol/L)</b>      | <b>1.36 (1.12-1.64)</b> | <b>0.002</b>       | ΔFBG, per SD (2.05 mmol/L)             | 1.05 (0.81-1.37)        | 0.70           |
| <b>ΔTG, per SD (1.30 mmol/L)</b>       | <b>2.13 (1.63-2.77)</b> | <b>&lt; 0.0001</b> | ΔTG, per SD (0.92 mmol/L)              | 1.19 (0.94-1.50)        | 0.16           |
| ΔTC, per SD (0.69 mmol/L)              | 1.15 (0.95-1.40)        | 0.16               | ΔTC, per SD (0.79 mmol/L)              | 0.87 (0.61-1.23)        | 0.41           |
| <b>ΔHDL-C, per SD (0.25 mmol/L)</b>    | <b>0.55 (0.44-0.70)</b> | <b>&lt; 0.0001</b> | <b>ΔHDL-C, per SD (0.28 mmol/L)</b>    | <b>0.45 (0.30-0.68)</b> | <b>0.0002</b>  |
| ΔLDL-C, per SD (0.56 mmol/L)           | 1.01 (0.83-1.24)        | 0.89               | ΔLDL-C, per SD (0.57 mmol/L)           | 0.98 (0.69-1.40)        | 0.89           |
| <b>ΔUA, per SD (58.77 umol/L)</b>      | <b>1.35 (1.10-1.65)</b> | <b>0.005</b>       | <b>ΔUA, per SD (50.32 umol/L)</b>      | <b>1.54 (1.13-2.06)</b> | <b>0.007</b>   |
| ΔfT3, per SD (1.03 pmol/L)             | 1.10 (0.76-1.60)        | 0.31               | ΔfT3, per SD (0.87 pmol/L)             | 1.18 (0.65-2.15)        | 0.59           |
| ΔfT4, per SD (1.96 pmol/L)             | 1.23 (0.96-1.58)        | 0.10               | ΔfT4, per SD (2.45 pmol/L)             | 1.62 (0.80-3.27)        | 0.18           |

BMI: body mass index; SBP: systolic blood pressure; DBP: diastolic blood pressure; FBG: fasting blood glucose; TG: triglyceride; TC: total cholesterol; HDL-C: high density lipoprotein cholesterol; LDL-C: low density lipoprotein cholesterol; fT3: free triiodothyronine; fT4: free thyroxine; TSH: thyroid stimulating hormone; UA: uric acid. SD: standard deviation.

Data was adjusted for age, smoking and alcohol habits, status of diabetes and hypertension, BMI, SBP, DBP, FBG, TG, TC, HDL-C, LDL-C, UA, fT3, fT4, ALT and AST.
